# Supplementary material for: The implication of FLT3 amplification for FLT targeted therapeutics in solid tumors
Source: PubMed Central journal article supplement (PMC5356878; doi:10.18632/oncotarget.13700), 2016-11-29
Supplement: oncotarget-08-3237-s001.pdf [file oncotarget-08-3237-s001.pdf]

# The implication of FLT3 amplification for FLT targeted therapeutics in solid tumors

## SUPPLEMENTARY FIGURE

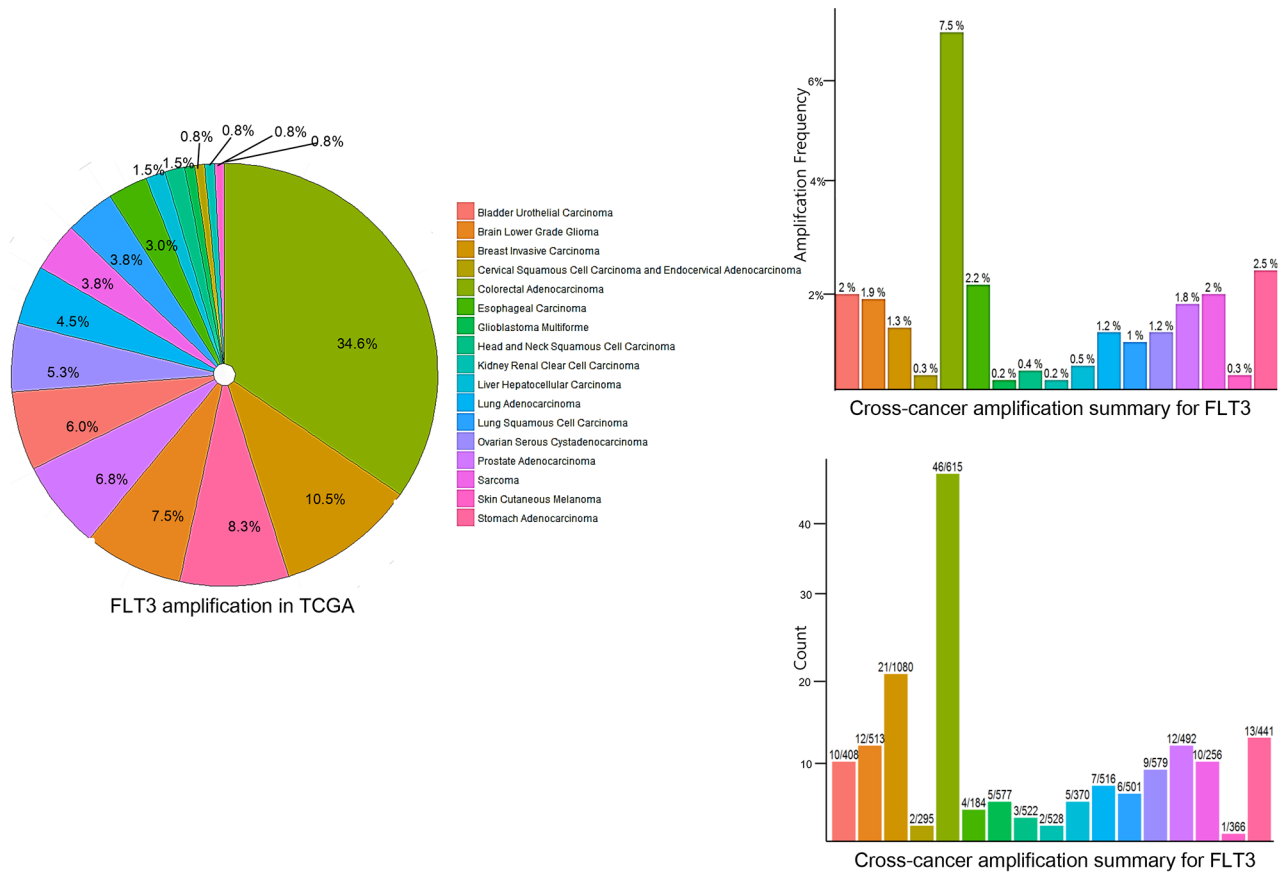

Supplementary Figure S1: The incidence of FLT3 amplification in the TCGA data set.
